# Supplementary material for: A Thixotropic Polyglycerol Sebacate-Based Supramolecular Hydrogel as an Injectable Drug Delivery Matrix
Source: MDPI journal article supplement (doi:10.3390/polym8040130), 2016-04-07
Supplement: s1 [file s1]

# Supplementary Materials: A Thixotropic Polyglycerol Sebacate-Based Supramolecular Hydrogel as an Injectable Drug Delivery Matrix

Hongye Ye, Cally Owh, Shan Jiang, Cavin Zhen Quan Ng, Daniel Wirawan and Xian Jun Loh

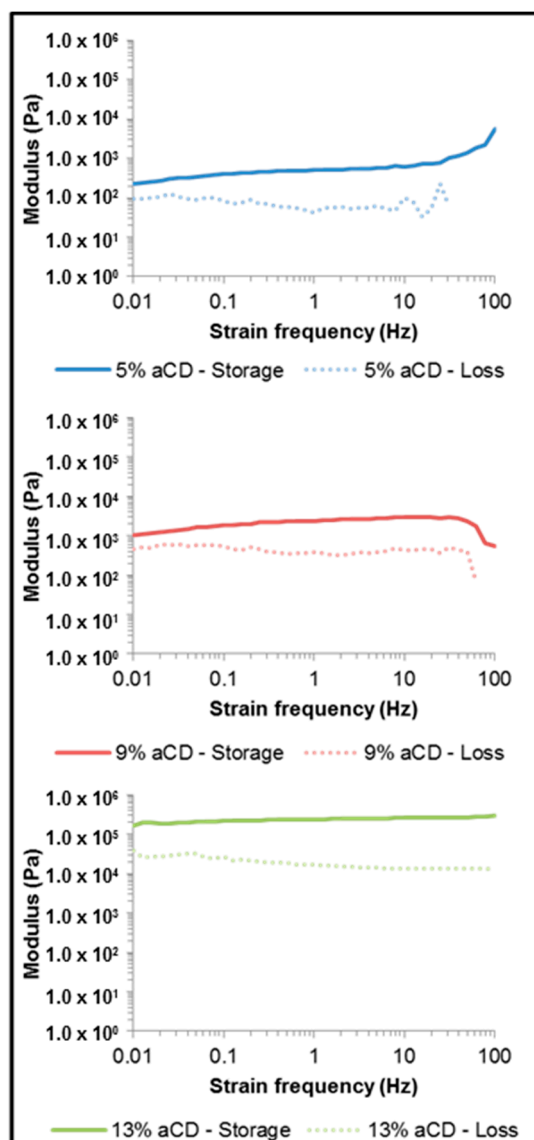

**Figure S1.** The oscillation frequency sweep in the range of 0.01–10 Hz at a shear strain of 0.01%. The hydrogels remained in a gel state ( $G' > G''$ ) throughout the oscillation frequency sweep range and did not lose their integrity for all  $\alpha$ CD concentrations.

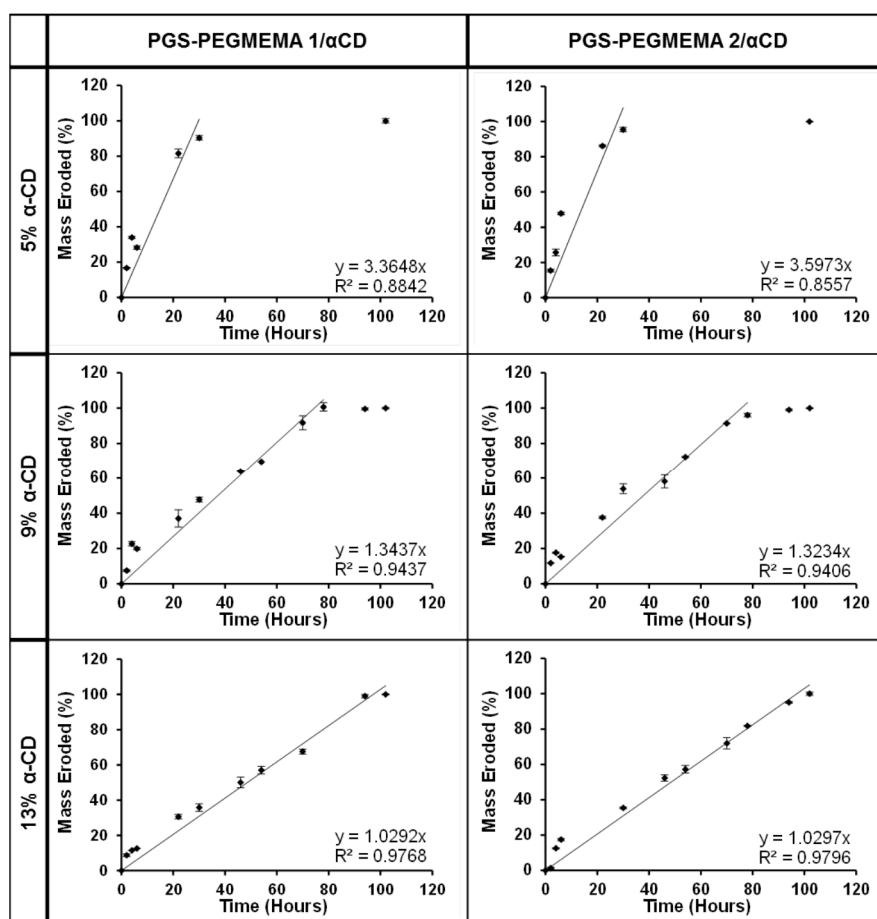

**Figure S2.** The percentage of mass of hydrogel eroded in PBS over time. The rate of the % mass eroded over time decreased with increasing  $\alpha$ CD concentrations.

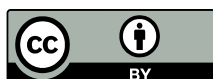

© 2016 by the authors; licensee MDPI, Basel, Switzerland. This article is an open access article distributed under the terms and conditions of the Creative Commons by Attribution (CC-BY) license (<http://creativecommons.org/licenses/by/4.0/>).
